# Supplementary figures and images for: VISTA Regulates the Development of Protective Antitumor Immunity
Source: Oxford University Press journal article supplement (doi:10.1158/0008-5472.can-13-1506), 2014-03-31

Figure S1

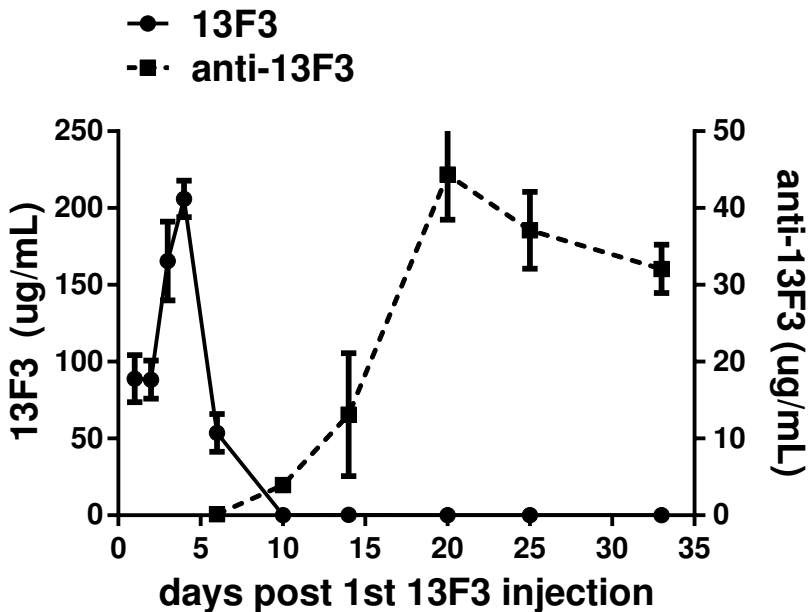

Supplement: 00085472can131506-sup-fig1.pdf [file 00085472can131506-sup-fig1.pdf]

**Figure S2**

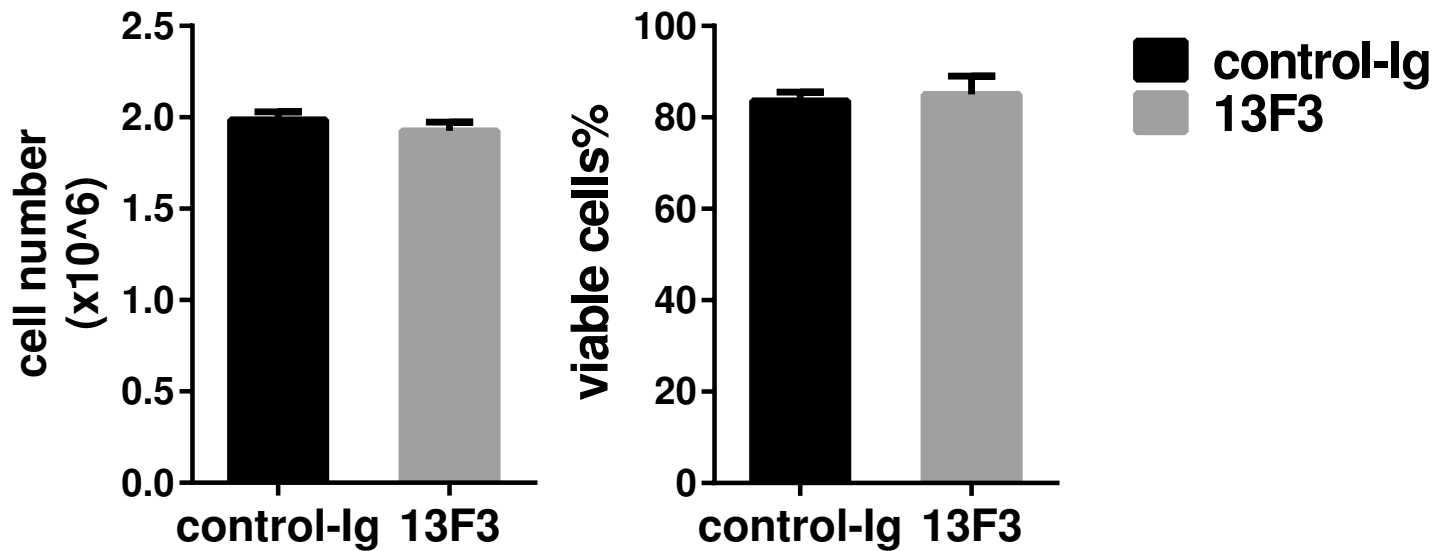

Supplement: 00085472can131506-sup-fig2.pdf [file 00085472can131506-sup-fig2.pdf]

Figure S3

CD45+ Cd11b+ Cd11c-  
tumor-infiltrating myeloid cells

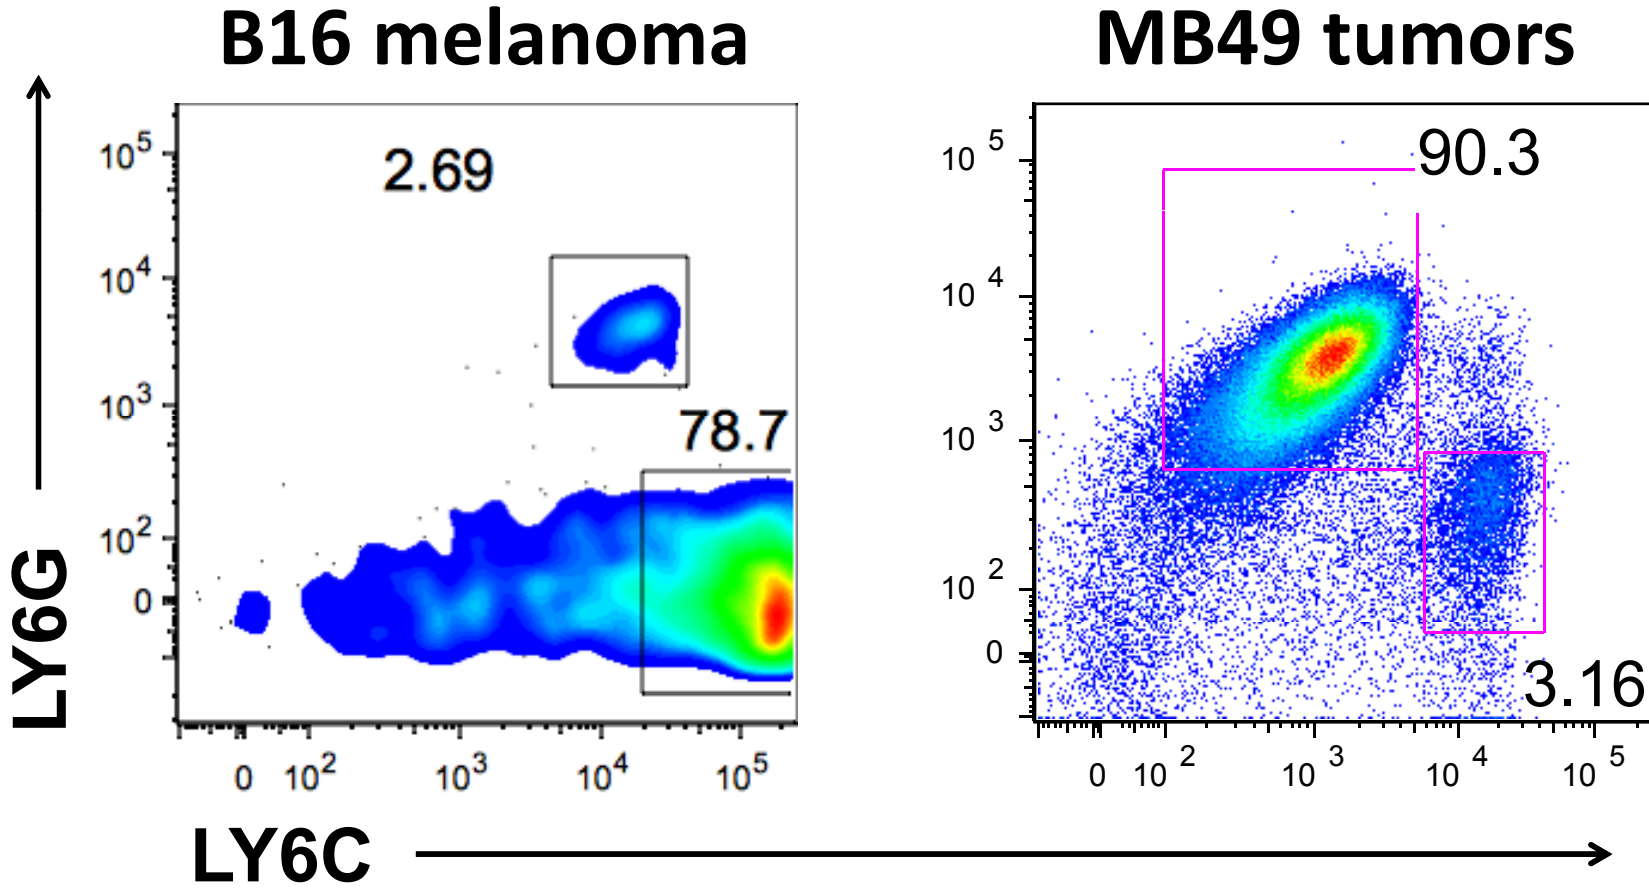

Supplement: 00085472can131506-sup-fig3.pdf [file 00085472can131506-sup-fig3.pdf]

# Figure S4

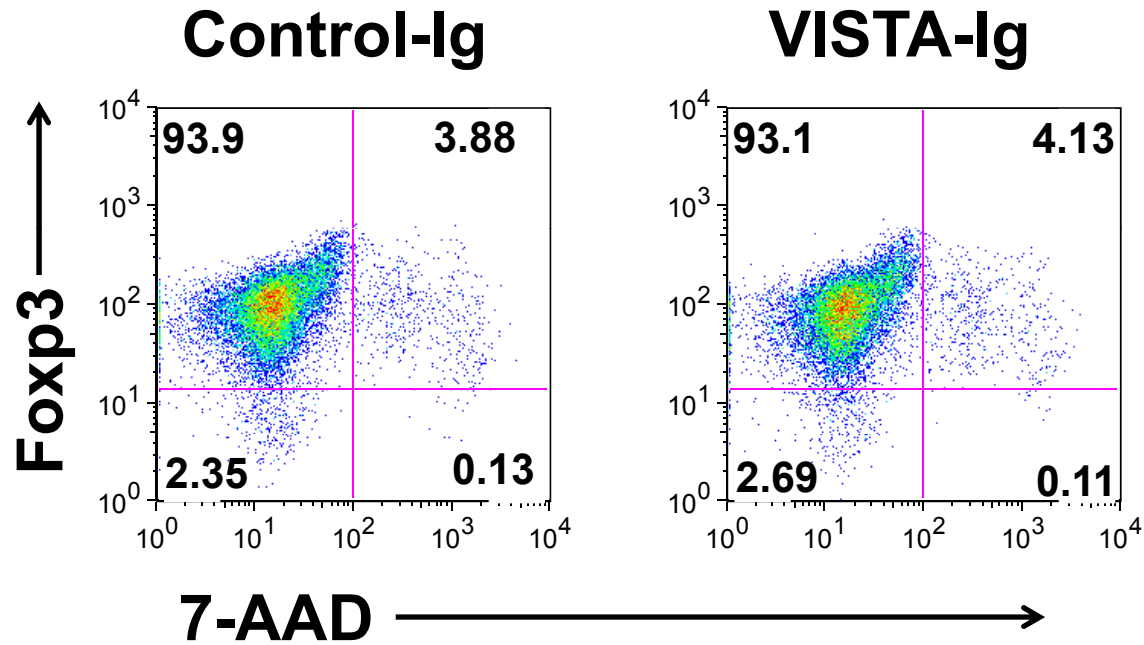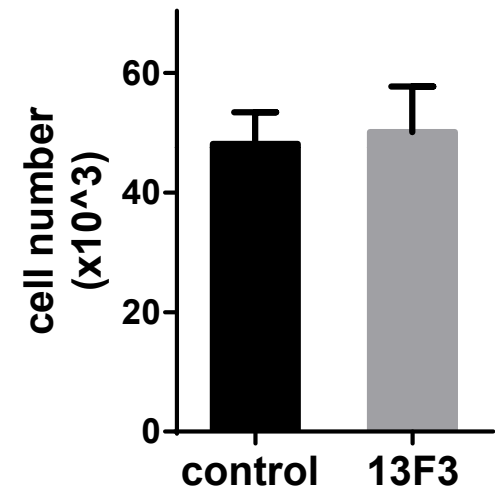

Supplement: 00085472can131506-sup-fig4.pdf [file 00085472can131506-sup-fig4.pdf]

Figure S5

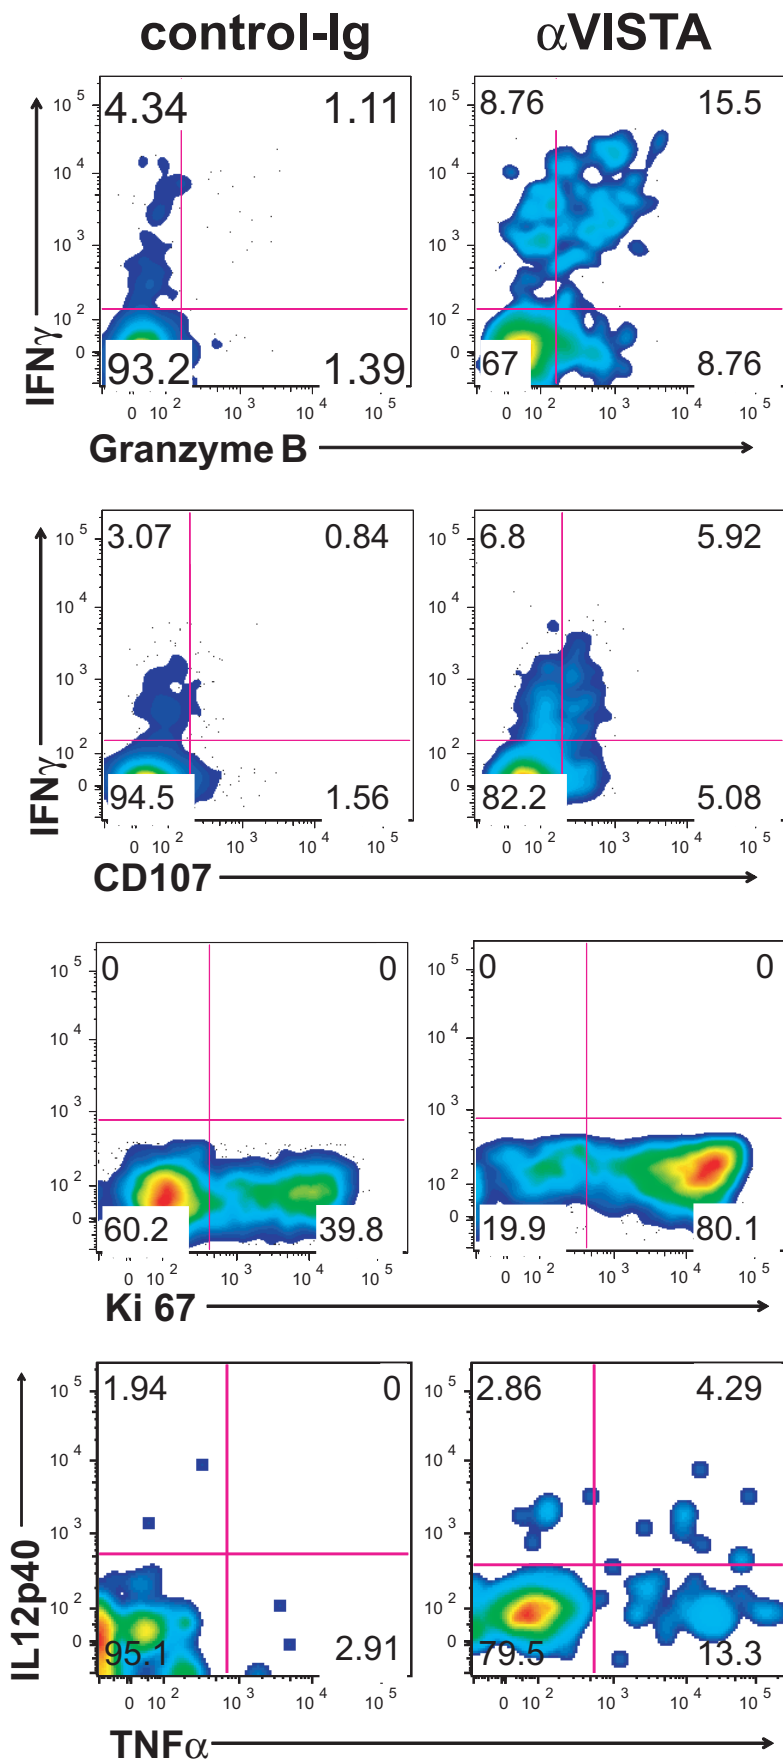

Supplement: 00085472can131506-sup-fig5.pdf [file 00085472can131506-sup-fig5.pdf]

**Figure S6**

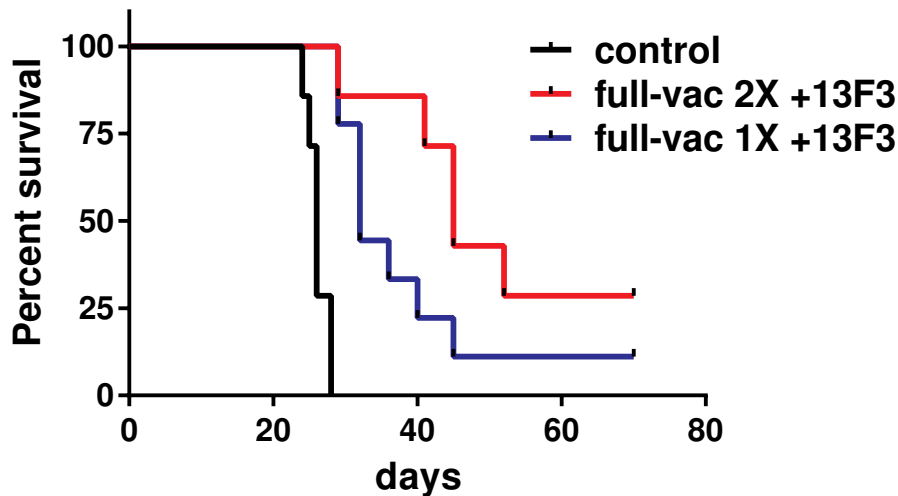

Supplement: 00085472can131506-sup-fig6.pdf [file 00085472can131506-sup-fig6.pdf]

Figure S7

A

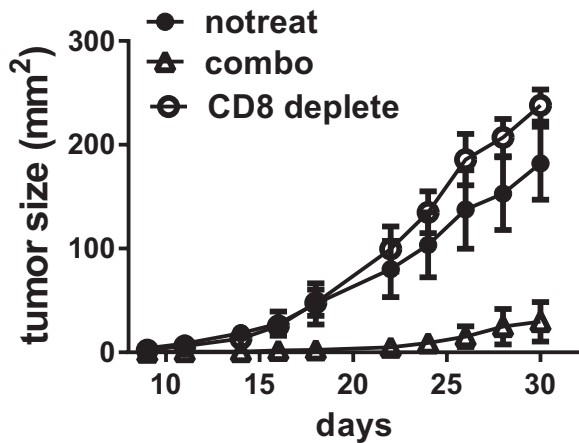

B

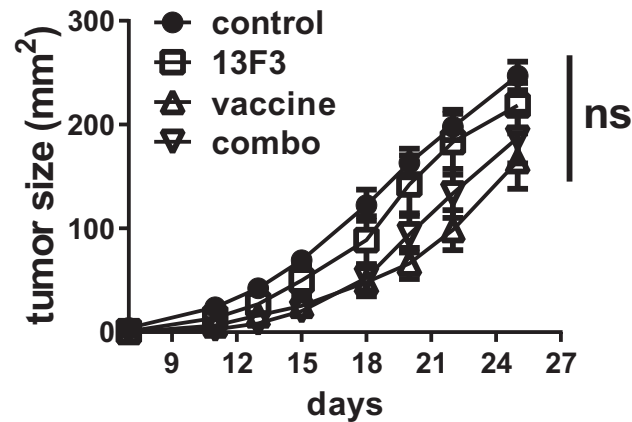

Supplement: 00085472can131506-sup-fig7.pdf [file 00085472can131506-sup-fig7.pdf]
